# Supplementary material for: Antithrombotic Effects of Combined PAR (Protease-Activated Receptor)-4 Antagonism and Factor Xa Inhibition
Source: PubMed Central journal article supplement (PMC7571844; doi:10.1161/atvbaha.120.314960), 2020-09-10
Supplement: atv-40-2678-s001.pdf [file atv-40-2678-s001.pdf]

# **SUPPLEMENTAL MATERIALS**

## **Antithrombotic effects of combined protease-activated receptor-4 antagonism and factor Xa inhibition**

### **Authors:**

Mohammed N Meah (MB ChB)<sup>a</sup>, Jennifer Raftis (PhD)<sup>a</sup>, Simon J. Wilson (PhD)<sup>a</sup>,  
Vidya Perera (PhD)<sup>b</sup>, Samira M Garonzik (MS; PharmD)<sup>b</sup>, Bindu Murthy (PharmD)<sup>b</sup>,  
J Gerry Everlof (MS)<sup>c</sup>, Ronald Aronson (MD)<sup>b</sup>, Joseph Luetzgen (BS)<sup>c</sup>, David E  
Newby (DSc)<sup>a</sup>

<sup>a</sup>British Heart Foundation Centre for Cardiovascular Science, University of  
Edinburgh, Edinburgh, UK

<sup>b</sup>Bristol-Myers Squibb, Princeton Pike Facility, Princeton, New Jersey, USA

<sup>c</sup>Bristol-Myers Squibb, Lawrenceville Facility, Princeton, New Jersey, USA

## Supplemental Figures

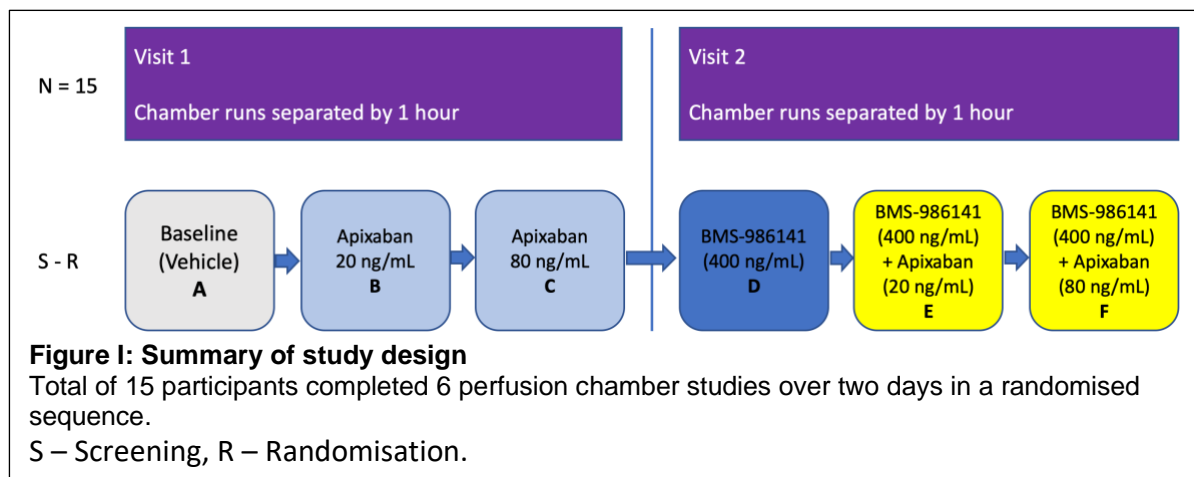

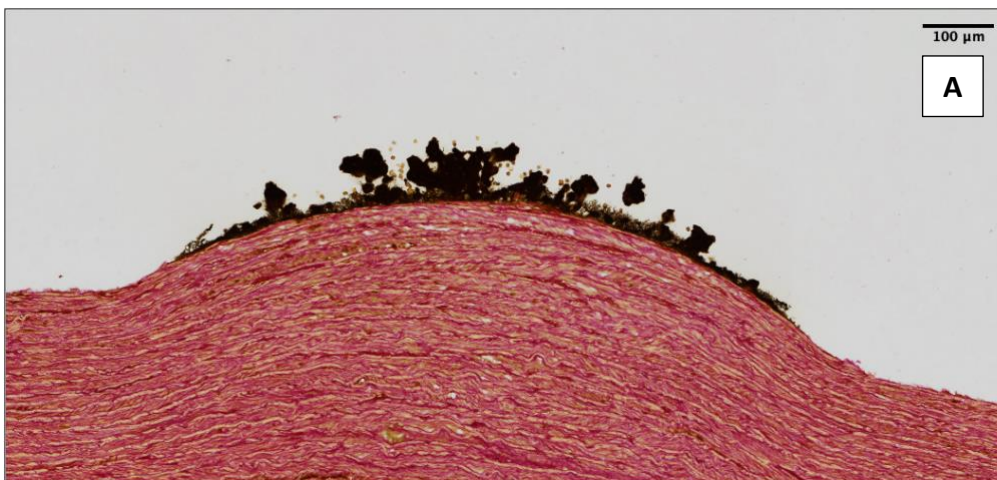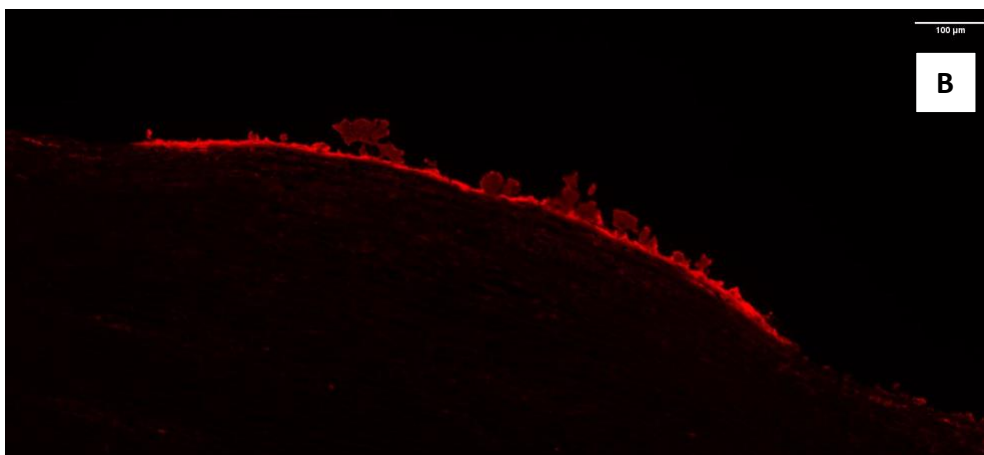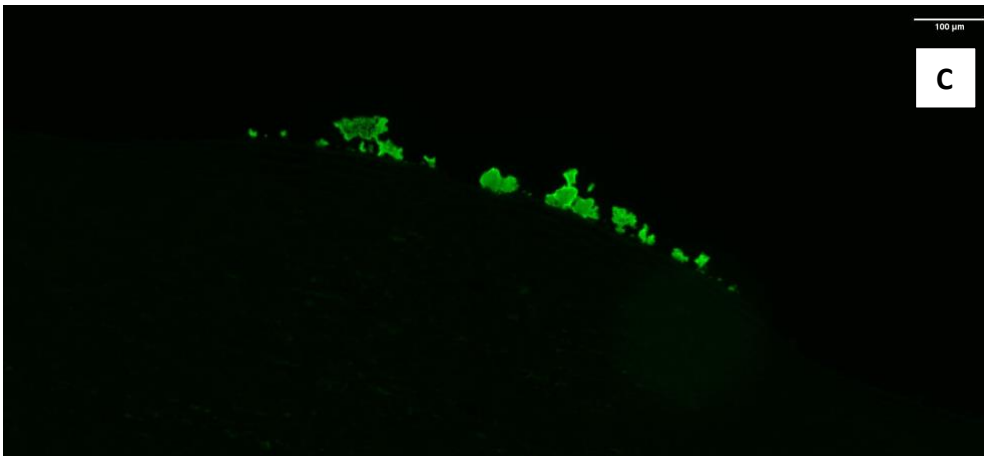

**Figure II: Representative images of porcine aorta.**

**[A]** Representative image of porcine aorta exposed to human blood with polyclonal goat antihuman fibrin antibody and CD61 monoclonal mouse antihuman antibody to allow quantification of total thrombus area.

**[B]** Representative image of porcine aorta exposed to human blood with polyclonal goat antihuman fibrin antibody and CD61 monoclonal mouse antihuman antibody to allow quantification of fibrin-rich thrombus area (counterstained with cyanine 3).

**[C]** Representative image of porcine aorta exposed to human blood with polyclonal goat antihuman fibrin antibody and CD61 monoclonal mouse antihuman antibody to allow quantification of platelet-rich thrombus area (counterstained with fluorescein isothiocyanate).

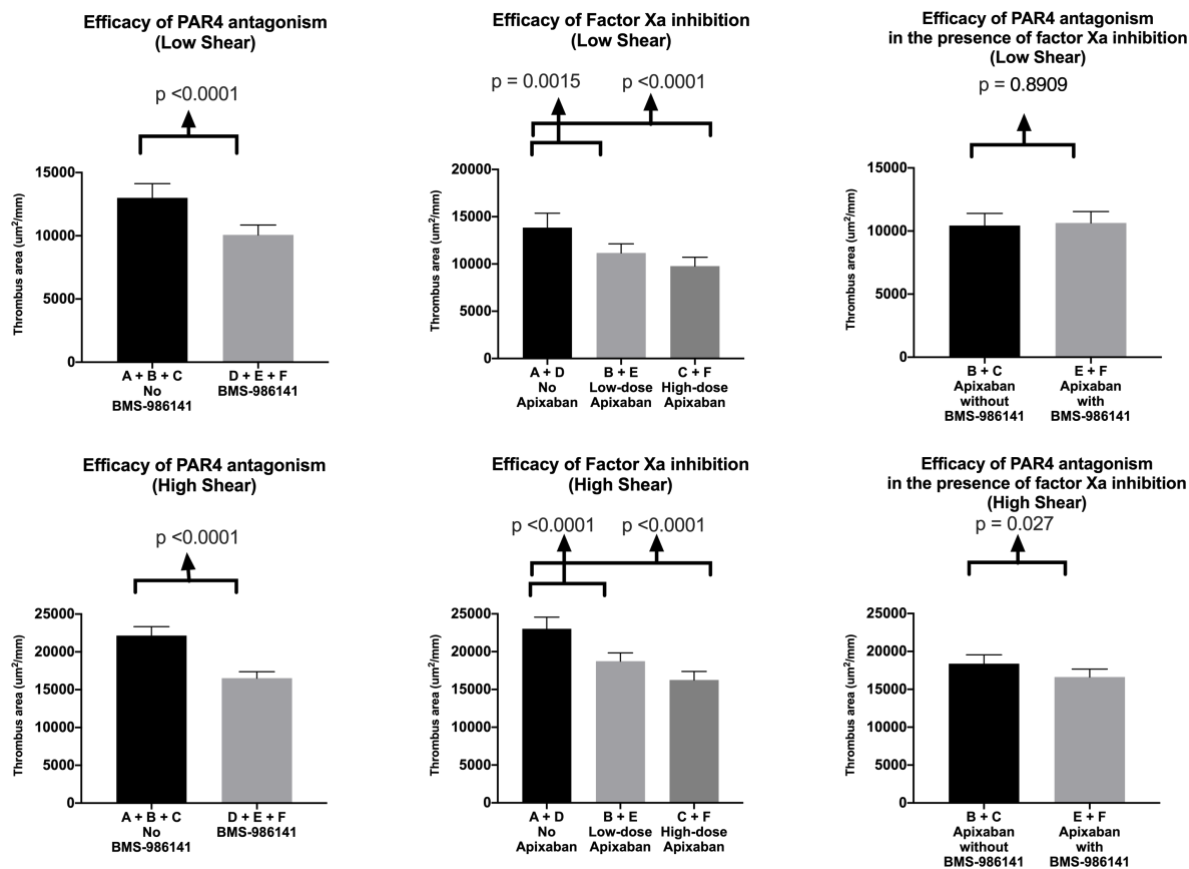

**Figure III: Total Thrombus Area in the *Ex-Vivo* Perfusion Chamber**

Efficacy of compounds at reducing total thrombus area in conditions of low-shear and high-shear stress. All compound(s) reduced total thrombus area at both high and low-shear stress conditions. The addition of BMS-986141 to apixaban led to further reduction in total thrombus area in conditions of high-shear stress.

(A)- Vehicle, (B)- low dose apixaban, (C)- high dose apixaban, (D)- BMS-986141, (E)- low-dose apixaban and BMS-986141, (F)- high-dose apixaban and BMS-986141.

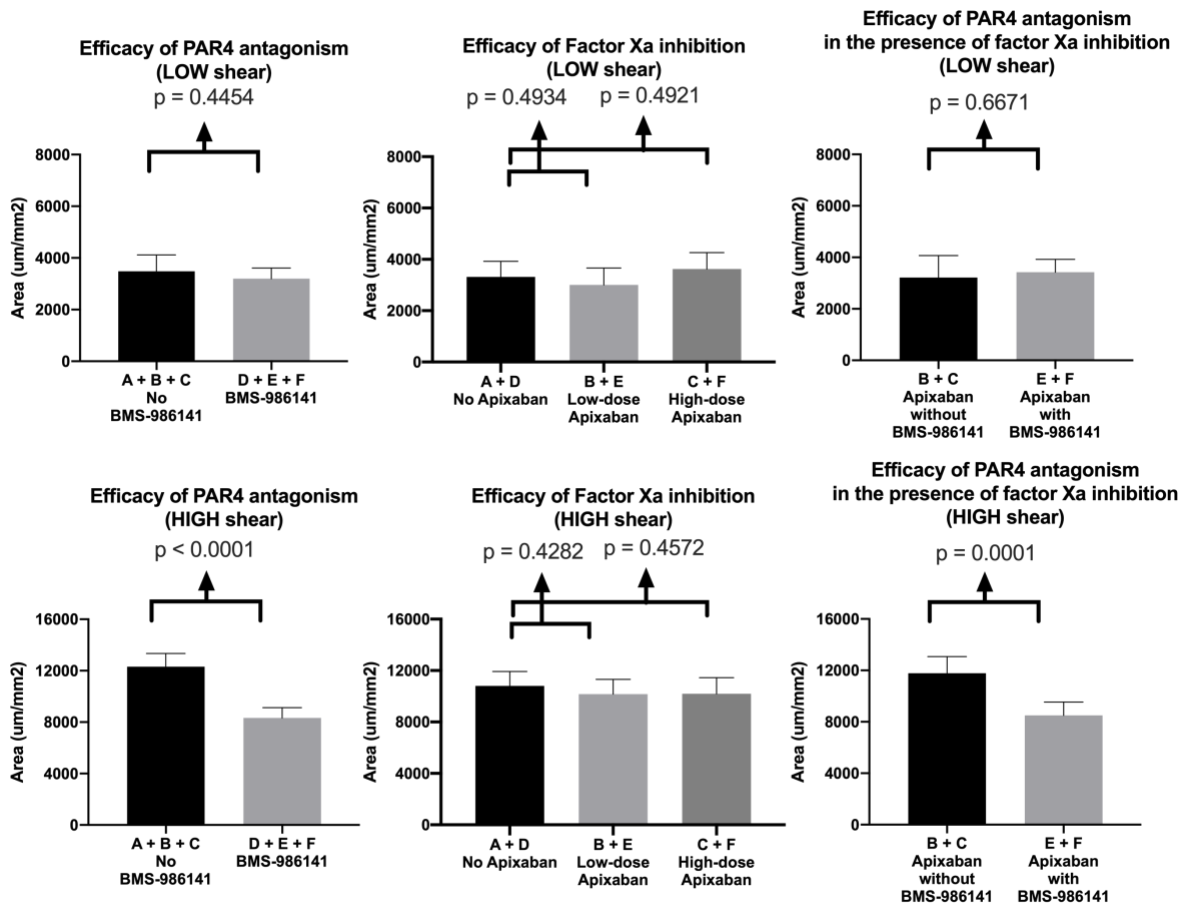

**Figure IV: Platelet-rich Thrombus Area in the Ex-Vivo Perfusion Chamber**

Efficacy of compounds at reducing platelet-rich thrombus area in conditions of low-shear and high-shear stress. Compound(s) had no discernible effect in conditions of low shear. At high shear BMS-986141 but NOT apixaban, caused a reduction in platelet-rich thrombus area. The addition of BMS to apixaban caused further reductions in platelet-rich thrombus area.

(A)- Vehicle, (B)- low dose apixaban, (C)- high dose apixaban, (D)- BMS-986141, (E)- low dose apixaban and BMS-986141, (F)- high dose apixaban and BMS-986141.

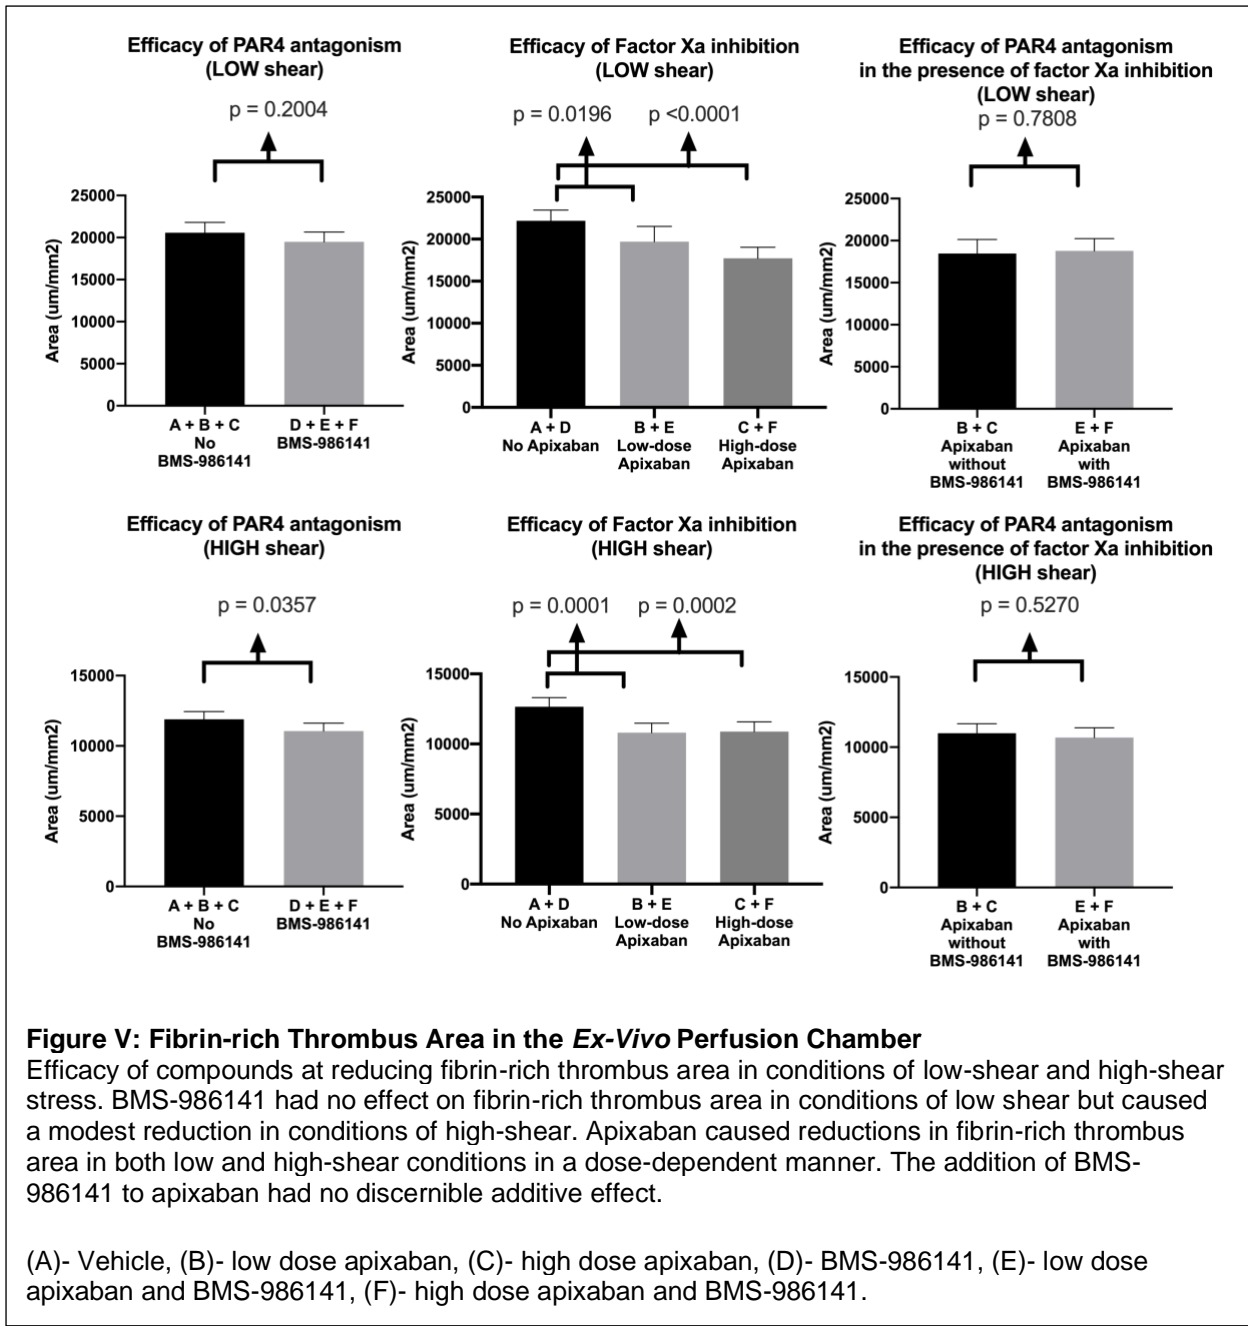

**Figure V: Fibrin-rich Thrombus Area in the Ex-Vivo Perfusion Chamber**

Efficacy of compounds at reducing fibrin-rich thrombus area in conditions of low-shear and high-shear stress. BMS-986141 had no effect on fibrin-rich thrombus area in conditions of low shear but caused a modest reduction in conditions of high-shear. Apixaban caused reductions in fibrin-rich thrombus area in both low and high-shear conditions in a dose-dependent manner. The addition of BMS-986141 to apixaban had no discernible additive effect.

(A)- Vehicle, (B)- low dose apixaban, (C)- high dose apixaban, (D)- BMS-986141, (E)- low dose apixaban and BMS-986141, (F)- high dose apixaban and BMS-986141.

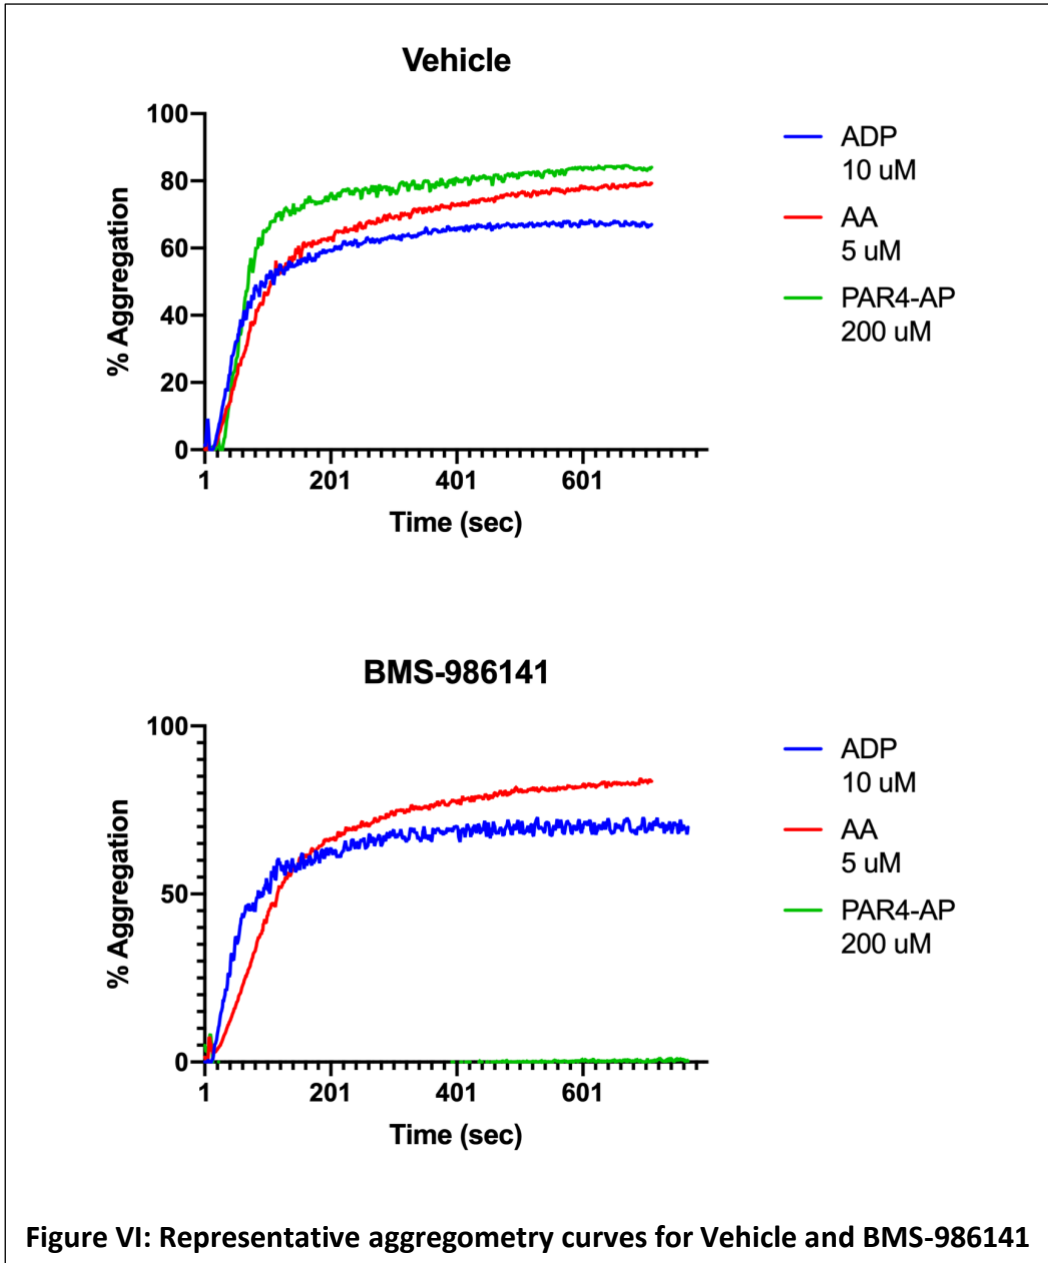

## Supplemental Tables

| No of participants | Perfusion Sequence 1 | Perfusion Sequence 2 | Perfusion Sequence 3 | Perfusion Sequence 4 | Perfusion Sequence 5 | Perfusion Sequence 6 |
|--------------------|----------------------|----------------------|----------------------|----------------------|----------------------|----------------------|
| N= 3               | A                    | B                    | C                    | D                    | E                    | F                    |
| N= 2               | B                    | C                    | D                    | E                    | F                    | A                    |
| N= 2               | C                    | D                    | E                    | F                    | A                    | B                    |
| N= 3               | D                    | E                    | F                    | A                    | B                    | C                    |
| N= 2               | E                    | F                    | A                    | B                    | C                    | D                    |
| N= 3               | F                    | A                    | B                    | C                    | D                    | E                    |

(A)- Placebo/vehicle, (B)- low-dose apixaban, (C)- high-dose apixaban, (D)- BMS-986141, (E)- BMS-986141 and low-dose apixaban, (F)- BMS-986141 and high-dose apixaban.

|                                           |           |
|-------------------------------------------|-----------|
| Men                                       | 8 (53)    |
| Age (years)                               | 29.5±6.1  |
| Body-mass index (kg/m <sup>2</sup> )      | 24.4±3.5  |
| Haemoglobin (g/dL)                        | 145±12    |
| Platelet count (x10 <sup>9</sup> /L)      | 260±41    |
| Activated partial thromboplastin time (s) | 29.8±4.1  |
| Prothrombin time (s)                      | 11.9±0.74 |
| n (%); mean±standard deviation.           |           |

| Study Code              | Study Drug and Target Concentration | Plasma Concentration (ng/mL) |
|-------------------------|-------------------------------------|------------------------------|
| A                       | Vehicle                             | -                            |
| B                       | Apixaban, 20 ng/mL                  | 15.8±2.4                     |
| C                       | Apixaban, 80 ng/mL                  | 72.3±18.7                    |
| D                       | BMS-986141, 400 ng/mL               | 285.0±75.1                   |
| E                       | Apixaban, 20 ng/mL                  | 16.8±4.8                     |
|                         | BMS-986141, 400 ng/mL               | 289.9±68.2                   |
| F                       | Apixaban, 80 ng/mL                  | 60.8±25.1                    |
|                         | BMS-986141, 400 ng/mL               | 293.3±76.6                   |
| mean±standard deviation |                                     |                              |



| <b>Table IV: Platelet studies</b>                                                                                                                                                                                                                                                  |                        |                                |                         |
|------------------------------------------------------------------------------------------------------------------------------------------------------------------------------------------------------------------------------------------------------------------------------------|------------------------|--------------------------------|-------------------------|
| <b>Comparison of max platelet aggregation in presence of ADP</b>                                                                                                                                                                                                                   |                        |                                |                         |
| <b>Comparators</b>                                                                                                                                                                                                                                                                 | <b>Mean difference</b> | <b>95% Confidence Interval</b> | <b>Adjusted P-value</b> |
| <b>A vs B</b>                                                                                                                                                                                                                                                                      | -4.765                 | -26.32 to 16.79                | 0.6635                  |
| <b>A vs C</b>                                                                                                                                                                                                                                                                      | -21.02                 | -42.57 to 0.5361               | 0.0559                  |
| <b>A vs D</b>                                                                                                                                                                                                                                                                      | -19.97                 | -42.40 to 2.461                | 0.0807                  |
| <b>A vs E</b>                                                                                                                                                                                                                                                                      | -0.3042                | -21.49 to 20.89                | 0.9775                  |
| <b>A vs F</b>                                                                                                                                                                                                                                                                      | -4.465                 | -25.65 to 16.72                | 0.6784                  |
| <b>Comparison of max platelet aggregation in presence of AA</b>                                                                                                                                                                                                                    |                        |                                |                         |
| <b>Comparators</b>                                                                                                                                                                                                                                                                 | <b>Mean difference</b> | <b>95% Confidence Interval</b> | <b>Adjusted P-value</b> |
| <b>A vs B</b>                                                                                                                                                                                                                                                                      | 13.08                  | -8.474 to 34.63                | 0.2331                  |
| <b>A vs C</b>                                                                                                                                                                                                                                                                      | -17.36                 | -38.91 to 4.194                | 0.1139                  |
| <b>A vs D</b>                                                                                                                                                                                                                                                                      | 4.261                  | -18.17 to 26.69                | 0.7085                  |
| <b>A vs E</b>                                                                                                                                                                                                                                                                      | 2.981                  | -18.21 to 24.17                | 0.7819                  |
| <b>A vs F</b>                                                                                                                                                                                                                                                                      | -0.9936                | -22.18 to 20.20                | 0.9265                  |
| <b>Comparison of max platelet aggregation in presence of PAR4-AP</b>                                                                                                                                                                                                               |                        |                                |                         |
| <b>Comparators</b>                                                                                                                                                                                                                                                                 | <b>Mean difference</b> | <b>95% Confidence Interval</b> | <b>Adjusted P-value</b> |
| <b>A vs B</b>                                                                                                                                                                                                                                                                      | -10.93                 | -32.48 to 10.63                | 0.3189                  |
| <b>A vs C</b>                                                                                                                                                                                                                                                                      | -7.576                 | -29.13 to 13.98                | 0.4893                  |
| <b>A vs D</b>                                                                                                                                                                                                                                                                      | 64.62                  | 42.19 to 87.05                 | <0.0001                 |
| <b>A vs E</b>                                                                                                                                                                                                                                                                      | 61.43                  | 40.24 to 82.62                 | <0.0001                 |
| <b>A vs F</b>                                                                                                                                                                                                                                                                      | 67.20                  | 46.01 to 88.39                 | <0.0001                 |
| <b>Comparison of p-selectin expression in presence of PAR4-AP</b>                                                                                                                                                                                                                  |                        |                                |                         |
| <b>A vs D</b>                                                                                                                                                                                                                                                                      | 470648                 | 319694 to 621602               | <0.0001                 |
| <b>A vs E</b>                                                                                                                                                                                                                                                                      | 462512                 | 311558 to 613466               | <0.0001                 |
| <b>A vs F</b>                                                                                                                                                                                                                                                                      | 481773                 | 330819 to 632726               | <0.0001                 |
| <b>C vs E</b>                                                                                                                                                                                                                                                                      | -8136                  | -159089 to 142818              | 0.9144                  |
| <b>C vs F</b>                                                                                                                                                                                                                                                                      | 11125                  | -139829 to 162079              | 0.8831                  |
| <b>Comparison of platelet-monocyte aggregates in presence of PAR4-AP</b>                                                                                                                                                                                                           |                        |                                |                         |
| <b>A vs D</b>                                                                                                                                                                                                                                                                      | 35036                  | 7706 to 62366                  | 0.0127                  |
| <b>A vs E</b>                                                                                                                                                                                                                                                                      | 30586                  | 3256 to 57916                  | 0.0288                  |
| <b>A vs F</b>                                                                                                                                                                                                                                                                      | 36398                  | 9068 to 63728                  | 0.0098                  |
| <b>C vs E</b>                                                                                                                                                                                                                                                                      | -4450                  | -31780 to 22880                | 0.7464                  |
| <b>C vs F</b>                                                                                                                                                                                                                                                                      | 1362                   | -25968 to 28692                | 0.9211                  |
| (A)- Placebo/vehicle, (B)- low-dose apixaban, (C)- high-dose apixaban, (D)- BMS-986141, (E)- BMS-986141 and low-dose apixaban, (F)- BMS-986141 and high-dose apixaban. ADP – Adenosine diphosphate, AA – arachidonic acid, PAR4-AP – Protease-Activated Receptor 4 agonist peptide |                        |                                |                         |

| <b>Table V: Total Thrombus Area</b>                                                                                                                                                                                                                                                                                                                                                                                                                                                                                                                                                                                           |                                  |                                            |                                |                         |
|-------------------------------------------------------------------------------------------------------------------------------------------------------------------------------------------------------------------------------------------------------------------------------------------------------------------------------------------------------------------------------------------------------------------------------------------------------------------------------------------------------------------------------------------------------------------------------------------------------------------------------|----------------------------------|--------------------------------------------|--------------------------------|-------------------------|
| <b>Comparison of Total Thrombus Area (LOW-SHEAR STRESS)</b>                                                                                                                                                                                                                                                                                                                                                                                                                                                                                                                                                                   |                                  |                                            |                                |                         |
| <b>Comparators</b>                                                                                                                                                                                                                                                                                                                                                                                                                                                                                                                                                                                                            | <b>Percentage difference (%)</b> | <b>Mean difference (μm<sup>2</sup>/mm)</b> | <b>95% Confidence Interval</b> | <b>Adjusted P-value</b> |
| A vs B                                                                                                                                                                                                                                                                                                                                                                                                                                                                                                                                                                                                                        | -33.71                           | 5765                                       | 3521 to 8008                   | <0.0001                 |
| A vs C                                                                                                                                                                                                                                                                                                                                                                                                                                                                                                                                                                                                                        | -42.92                           | 7340                                       | 5267 to 9414                   | <0.0001                 |
| A vs D                                                                                                                                                                                                                                                                                                                                                                                                                                                                                                                                                                                                                        | -44.44                           | 7600                                       | 5411 to 9789                   | <0.0001                 |
| A vs E                                                                                                                                                                                                                                                                                                                                                                                                                                                                                                                                                                                                                        | -35.68                           | 6101                                       | 3858 to 8344                   | <0.0001                 |
| A vs F                                                                                                                                                                                                                                                                                                                                                                                                                                                                                                                                                                                                                        | -42.67                           | 7297                                       | 5175 to 9418                   | <0.0001                 |
| <b>Efficacy of PAR4 antagonism *</b>                                                                                                                                                                                                                                                                                                                                                                                                                                                                                                                                                                                          | -22.59                           | 2937                                       | 1616 to 4259                   | <0.0001                 |
| <b>Efficacy of low-dose apixaban †</b>                                                                                                                                                                                                                                                                                                                                                                                                                                                                                                                                                                                        | -19.38                           | 2685                                       | 1026 to 4344                   | 0.0015                  |
| <b>Efficacy of high-dose apixaban ‡</b>                                                                                                                                                                                                                                                                                                                                                                                                                                                                                                                                                                                       | -29.39                           | 4072                                       | 2515 to 5628                   | <0.0001                 |
| <b>Efficacy of combination §</b>                                                                                                                                                                                                                                                                                                                                                                                                                                                                                                                                                                                              | -0.9                             | 94.52                                      | -1553 to 1742                  | 0.8909                  |
| <b>Comparison of Total Thrombus Area (HIGH-SHEAR STRESS)</b>                                                                                                                                                                                                                                                                                                                                                                                                                                                                                                                                                                  |                                  |                                            |                                |                         |
| A vs B                                                                                                                                                                                                                                                                                                                                                                                                                                                                                                                                                                                                                        | -32.13                           | 9278                                       | 6924 to 11632                  | <0.0001                 |
| A vs C                                                                                                                                                                                                                                                                                                                                                                                                                                                                                                                                                                                                                        | -40.92                           | 11816                                      | 9403 to 14228                  | <0.0001                 |
| A vs D                                                                                                                                                                                                                                                                                                                                                                                                                                                                                                                                                                                                                        | -43.44                           | 12544                                      | 10152 to 14936                 | <0.0001                 |
| A vs E                                                                                                                                                                                                                                                                                                                                                                                                                                                                                                                                                                                                                        | -38.38                           | 11081                                      | 8663 to 13499                  | <0.0001                 |
| A vs F                                                                                                                                                                                                                                                                                                                                                                                                                                                                                                                                                                                                                        | -46.52                           | 13432                                      | 11019 to 15845                 | <0.0001                 |
| <b>Efficacy of PAR4 antagonism *</b>                                                                                                                                                                                                                                                                                                                                                                                                                                                                                                                                                                                          | -25.47                           | 5644                                       | 4228 to 7059                   | <0.0001                 |
| <b>Efficacy of low-dose apixaban †</b>                                                                                                                                                                                                                                                                                                                                                                                                                                                                                                                                                                                        | -18.58                           | 4277                                       | 2565 to 5989                   | <0.0001                 |
| <b>Efficacy of high-dose apixaban ‡</b>                                                                                                                                                                                                                                                                                                                                                                                                                                                                                                                                                                                       | -29.40                           | 6767                                       | 5035 to 8499                   | <0.0001                 |
| <b>Efficacy of combination §</b>                                                                                                                                                                                                                                                                                                                                                                                                                                                                                                                                                                                              | -9.65                            | 1774                                       | 18.02 to 3529                  | 0.027                   |
| <p>* [Vehicle + apixaban low-dose + apixaban high-dose] <b>VS</b> [BMS + BMS &amp; low-dose apixaban + BMS &amp; high-dose apixaban]</p> <p>† [Vehicle + BMS] <b>VS</b> [low-dose apixaban + BMS &amp; low-dose apixaban]</p> <p>‡ [Vehicle + BMS] <b>VS</b> [high-dose apixaban + BMS &amp; high-dose apixaban]</p> <p>§ [Apixaban low-dose + Apixaban high-dose] <b>VS</b> [ BMS &amp; low-dose apixaban + BMS &amp; high-dose apixaban].</p> <p>(A)- Placebo/vehicle, (B)- low-dose apixaban, (C)- high-dose apixaban, (D)- BMS-986141, (E)- BMS-986141 and low-dose apixaban, (F)- BMS-986141 and high-dose apixaban.</p> |                                  |                                            |                                |                         |

**Table VI: Platelet-rich and Fibrin-rich Thrombus Area**

| Comparators                             | Comparison of Platelet-rich Thrombus Area<br>(LOW-SHEAR STRESS)  |                                       |                         |                  | Comparison of Fibrin-rich Thrombus Area<br>(LOW-SHEAR STRESS)  |                                       |                         |                  |
|-----------------------------------------|------------------------------------------------------------------|---------------------------------------|-------------------------|------------------|----------------------------------------------------------------|---------------------------------------|-------------------------|------------------|
|                                         | Percentage difference (%)                                        | Mean difference (µm <sup>2</sup> /mm) | 95% Confidence Interval | Adjusted P-value | Percentage difference (%)                                      | Mean difference (µm <sup>2</sup> /mm) | 95% Confidence Interval | Adjusted P-value |
| A vs B                                  | -27.01                                                           | 1038                                  | -302.2 to 2378          | 0.1286           | -6.42                                                          | 745.9                                 | -721.4 to 2213          | 0.3181           |
| A vs C                                  | -7.44                                                            | 285.4                                 | -975.4 to 1546          | 0.6565           | -31.62                                                         | 3673                                  | 2307 to 5039            | <0.0001          |
| A vs D                                  | -28.83                                                           | 1108                                  | -90.44 to 2306          | 0.0699           | -10.23                                                         | 1188                                  | -124.6 to 2501          | 0.0759           |
| A vs E                                  | -18.21                                                           | 699.5                                 | -503.7 to 1903          | 0.2537           | -21.52                                                         | 2500                                  | 1169 to 3831            | 0.0003           |
| A vs F                                  | -4.37                                                            | 167.7                                 | -1004 to 1339           | 0.7784           | -16.96                                                         | 1970                                  | 663.2 to 3277           | 0.0032           |
| <b>Efficacy of PAR4 antagonist *</b>    | -8.15                                                            | 284.1                                 | -445.4 to 1014          | 0.4454           | -5.32                                                          | 546.9                                 | -290.7 to 1385          | 0.2004           |
| <b>Efficacy of low-dose apixaban †</b>  | -9.41                                                            | 311.8                                 | -588.1 to 1212          | 0.4934           | -11.10                                                         | 1231                                  | 197.4 to 2264           | 0.0196           |
| <b>Efficacy of high-dose apixaban ‡</b> | -9.26                                                            | -307.1                                | -1172 to 557.9          | 0.4921           | -20.05                                                         | 2222                                  | 1229 to 3216            | <0.0001          |
| <b>Efficacy of combination §</b>        | -6.34                                                            | -203.4                                | -1131 to 724.6          | 0.6671           | -1.65                                                          | -152.8                                | -1230 to 924.3          | 0.7808           |
| Comparators                             | Comparison of Platelet-rich Thrombus Area<br>(HIGH-SHEAR STRESS) |                                       |                         |                  | Comparison of Fibrin-rich Thrombus Area<br>(HIGH-SHEAR STRESS) |                                       |                         |                  |
|                                         | Percentage difference (%)                                        | Mean difference (µm <sup>2</sup> /mm) | 95% Confidence Interval | Adjusted P-value | Percentage difference (%)                                      | Mean difference (µm <sup>2</sup> /mm) | 95% Confidence Interval | Adjusted P-value |
| A vs B                                  | -11.82                                                           | 1558                                  | -627.3 to 3743          | 0.1621           | -19.57                                                         | 2616                                  | 1321 to 3911            | <0.0001          |
| A vs C                                  | -9.35                                                            | 1233                                  | -989.6 to 3456          | 0.2765           | -15.82                                                         | 2114                                  | 808.2 to 3420           | 0.0015           |
| A vs D                                  | -39.32                                                           | 5185                                  | 2991 to 7379            | <0.0001          | -11.71                                                         | 1565                                  | 264.8 to 2865           | 0.0184           |
| A vs E                                  | -34.49                                                           | 4547                                  | 2335 to 6760            | <0.0001          | -18.82                                                         | 2516                                  | 1212 to 3819            | 0.0002           |
| A vs F                                  | -36.54                                                           | 4819                                  | 2581 to 7056            | <0.0001          | -21.32                                                         | 2850                                  | 1544 to 4156            | <0.0001          |
| <b>Efficacy of PAR4 antagonist *</b>    | -32.33                                                           | 3979                                  | 2653 to 5306            | <0.0001          | -7.01                                                          | 834.1                                 | 55.91 to 1612           | 0.0357           |
| <b>Efficacy of low-dose apixaban †</b>  | -5.96                                                            | 643.3                                 | -955.8 to 2242          | 0.4282           | -14.70                                                         | 1860                                  | 917.8 to 2803           | 0.0001           |
| <b>Efficacy of high-dose apixaban ‡</b> | -5.83                                                            | 629.2                                 | -991.8 to 2250          | 0.4572           | -14.04                                                         | 1776                                  | 828.6 to 2724           | 0.0002           |
| <b>Efficacy of combination §</b>        | -27.83                                                           | 3280                                  | 1622 to 4938            | 0.0001           | -2.85                                                          | 313.1                                 | -657.3 to 1284          | 0.5270           |

\* [Vehicle + apixaban low-dose + apixaban high-dose] **VS** [BMS + BMS & low-dose apixaban + BMS & high-dose apixaban], † [Vehicle + BMS] **VS** [low-dose apixaban + BMS & low-dose apixaban], ‡ [Vehicle + BMS] **VS** [high-dose apixaban + BMS & high-dose apixaban], § [Apixaban low-dose + Apixaban high-dose] **VS** [ BMS & low-dose apixaban + BMS & high-dose apixaban]. (A)- Placebo/vehicle, (B)- low-dose apixaban, (C)- high-dose apixaban, (D)- BMS-986141, (E)- BMS-986141 and low-dose apixaban, (F)- BMS-986141 and high-dose apixaban.

## Major Resources Table:

### Antibodies

| Target antigen              | Vendor or Source | Catalog #     | Working concentration |
|-----------------------------|------------------|---------------|-----------------------|
| Fibrinogen (Rabbit)         | DAKO             | A0080         | 1.2 µg/mL (1:5000)    |
| CD61 (Mouse)                | Dako             | M0753         | 1.28 µg/mL 1:50       |
| Normal goat serum           | Bio sera         | GO605/500     | 1:5                   |
| Goat anti Rabbit Peroxidase | Abcam            | Ab7171        | 1:1000                |
| Goat anti-Mouse Peroxidase  | Abcam            | Ab6823        | 1:1000                |
| DAPI                        | Sigma-Aldrich    | D9542         | 5 µg/mL 1:500         |
| Tyrimide Cy3                | Perkin Elmer     | NEL 744B001KT | 1:50                  |
| Tyrimide FITC               | Perkin Elmer     | NEL 741B00KT  | 1:50                  |

### Other

| Description  | Source / Repository      |
|--------------|--------------------------|
| Proteinase k | DAKO: S3020              |
| Refine kit   | Leica biosystems: DS9800 |
